# Supplementary material for: Investigation of pyrolysis temperature in the one-step synthesis of L10 FePt nanoparticles from a FePt-containing metallopolymer
Source: Royal Society of Chemistry journal article supplement (doi:10.1039/c4tc02058h), 2014-11-19
Supplement: c4tc02058h1.pdf [file c4tc02058h1.pdf]

## Investigation of pyrolysis temperature in the one-step synthesis of L1<sub>0</sub> FePt nanoparticles from a FePt-containing metalopolymer

Qingchen Dong,\* Guijun Li, Hua Wang, Philip Wing-Tat Pong, Chi-Wah Leung,\* Ian Manners,\* Cheuk-Lam Ho, Hua Li, Wai-Yeung Wong\*

Received (in XXX, XXX) Xth XXXXXXXXX 20XX, Accepted Xth XXXXXXXXX 20XX

DOI: 10.1039/b000000x

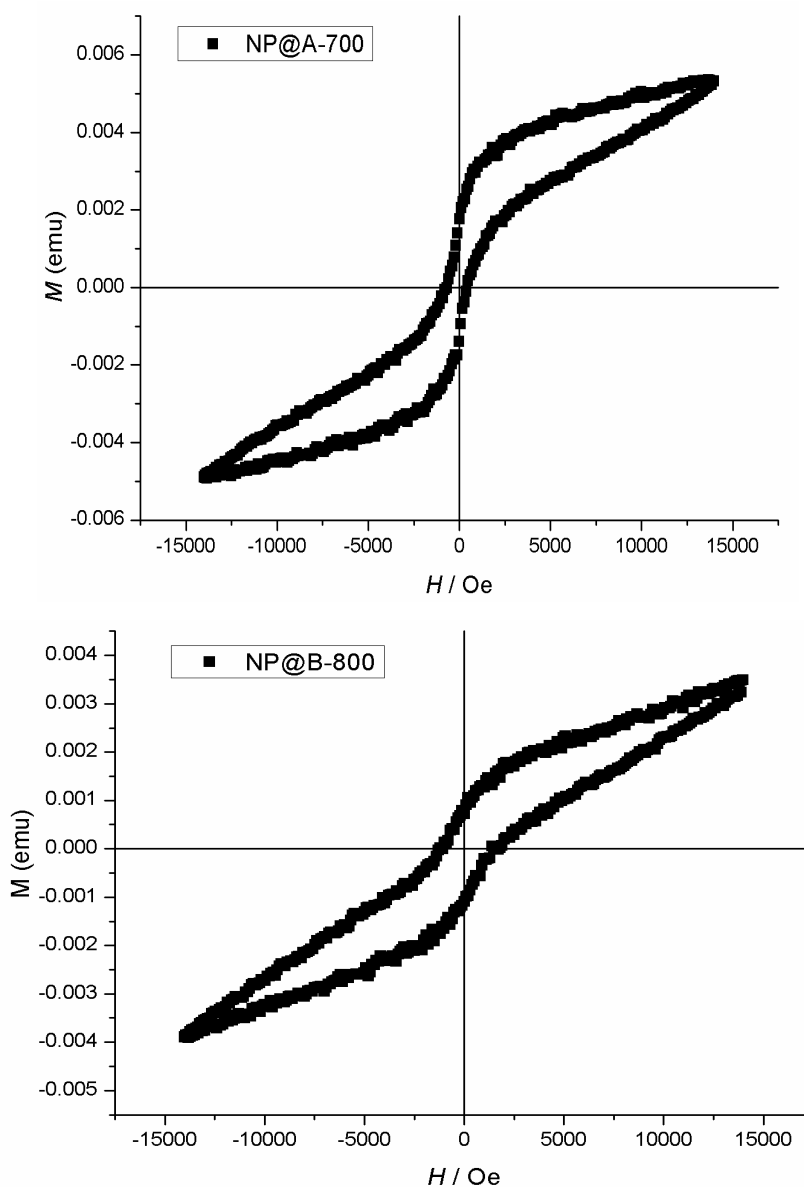

Fig. S1 Hysteresis loops of NP@A-700 (Top) and NP@B-800 (Bottom) measured at 100 K.
